# Supplementary material
Source: HighWire-hosted journal article supplement (doi:10.1101/rna.076240.120)
Supplement: Supplemental_Table_2.xlsx [file Supplemental_Table_2.xlsx]

## Sheet: Sheet1
miRNA	1	2	3	4	5	6	7	8	9	10	11	12	13	14	15	16	17	18	19	20	21	22	23	24	25	26	27	28	29	30	31	32	33	34	35	36	37	38	39	40	NL1	NL2	NL3	NL4	NL5	NL6	NL7	NL8	NL9
hsa-let-7a-1			0.900448					0.780391	0.766356		0.945145	0.950199		0.917628	0.910213			0.984296		0.955421	0.983247		0.977358	0.936145	0.982087	0.965419	0.846918		0.985641	0.980779	0.971619	0.953367	0.977498	0.963541	0.987034	0.989584		0.97748	0.944929	0.994683			0.439821		0.221714
hsa-let-7a-3			0.21534						-0.394232						0.772475	0.710983			0.890793	0.97574			0.0155753	0.937186	0.92554	0.797571			0.883096	0.776245	0.810916	0.914639	0.915896	0.865945		0.794367	0.914274	0.968726		0.957895
hsa-let-7b								0.626866			0.494252				0.820853					0.8663				0.855509	0.896346		0.589285	1.57425e-06	0.908116			0.728524		0.734043		0.852102	0.879111	0.753615						0.867916			-0.638446		0.530383
hsa-let-7c			0.894253		0.821109	0.744917		0.415094		0.846567	0.73576		0.748408		0.824418	0.974141	0.947699	0.829049		0.947685	0.965819	0.5	0.9593	0.90744	0.919257	0.952874	0.920655	0.683274	0.967832	0.853211	0.782738	0.917554	0.94844	0.899358	0.837266	0.946583	0.924468	0.907467		0.983902	0.419383					0.604527		0.037059
hsa-let-7d			0.878825		0.889898			0.61414	0.727689	0.849284	0.89024	0.910371	0.747155		0.641507	0.929578	0.906619	0.877418	0.94559	0.901567	0.877863	0.929229	0.926605	0.797399	0.96197	0.86053		0.974447	0.943234	0.893857	0.777654	0.810575	0.952305	0.745103	0.953742	0.951581		0.808261	0.801133	0.956826	0.808646		0.425792	0.309091			0.140697	0.000200598
hsa-let-7e	-0.0693868							0.298237			1.93427e-06									0.84326									0.0465106		0.284008					0.17757							0.28101			0.98683	-0.0111048
hsa-let-7f-1			0.505154					0.196652				0.657534			0.941038	0.94995			0.870466					0.903987	0.886926	0.934598		0.804348	0.914838	0.881438	0.900539	0.918107		0.965771		0.927293		0.986665	0.932459	0.988153								0.0700187
hsa-let-7g					0.39124			-0.101421			0.729051		0.579709		0.488215			0.841968	0.931862	0.848806	-0.160265	0.65642	0.632813	0.70495		0.214783	0.675508	0.966566	0.451512	0.860425	0.94599	0.729833	0.88725	0.822849	0.932413	0.851719	0.907236	0.826853	0.720403	0.978204	-0.50829
hsa-let-7i					0.347518				1.17844e-07						-0.226	-0.215684	0.626922	0.293661	0.796749	0.89985	0.655073			-0.100796	0.656146				0.105769	-0.320393		0.755294	0.29043	0.479602		0.736393		0.925698	0.872774	0.739502			-0.253442	0.91484	0.393643
hsa-mir-1-1																																			-0.164619
hsa-mir-100								0.506993		0.867812	0.679348				0.888577	0.903835			0.832549	0.859551				0.947296			0.368614			0.916632		0.811204		0.926004	0.967373	0.875544	0.943147			0.955732						0.469568
hsa-mir-101-1								0.914894							0.961952				0.974158	0.963147		0.675193	0.976303	0.960424					0.920837	0.954039		0.973624	0.987086	0.987203		0.970423		0.956753	0.966754	0.987575								0.625618
hsa-mir-106a																				0.886234															-1.77391e-07
hsa-mir-106b	0.777777			0.829351				0.783282	0.499442	0.768786	0.648047	0.840128		0.864172	0.439061	0.950592	0.924472	0.970309	0.889261	0.966547	0.93597	0.920941	0.972047	0.70739	0.885682	0.799095	0.800437		0.965777	0.814532	0.876132	0.790599	0.951576	0.744889	0.967619	0.952712	0.934208	0.819508	0.950736	0.876155			-0.291588	0.759479	0.998694		0.602327	0.532663	-1.71601
hsa-mir-10a								0.327914										0.873479	0.753695	0.967143						0.565217						0.236948			-0.265623										-9.51613e-05
hsa-mir-10b																													0.604061			0.959071			0.326743
hsa-mir-122	0.744051	0.957699	0.982634	0.947208		0.949507	0.870466		0.966178	0.98959	0.972516	0.984616	0.96204	0.986731	0.879974	0.982291	0.983327	0.921024	0.991907	0.931081	0.995358	0.968148	0.988431	0.967214	0.988061	0.966916	0.959143	0.993176	0.915882	0.97361	0.972744	0.969472	0.958849	0.981185	0.983985	0.985006	0.986315	0.995264	0.973779	0.992056	0.778561	0.480768	0.636687	0.894964	0.844862	0.855887	0.911062	0.898076	0.694391
hsa-mir-1226		0.977656	0.973244	0.960871	0.957468	0.944279	0.908577	0.767099	0.981008	0.960886	0.984067	0.991699	0.984433	0.977109	0.961499	0.986276	0.994316	0.993753	0.984855	0.984356	0.992147	0.995611	0.980717	0.977318	0.981261	0.992823	0.976802	0.964898	0.992716	0.992355	0.989648	0.988353	0.988929	0.986503	0.995582	0.984387	0.993397	0.984601	0.97961	0.989908	0.989127		0.945481	0.982662	0.880182	0.99707	0.987038	0.999865	0.999389
hsa-mir-124-1
hsa-mir-124-2					-1.89881e-06										-3.1234e-06								-9.40488e-07						0.634146	0.267552				2.2578e-06	0.25205
hsa-mir-124-3
hsa-mir-125a											0.661591				0.574014	-1.31579				0.982525									0.899166						0.559836			0.562023	0.656746
hsa-mir-126									0.478262	0.898888	0.953019				0.905345			0.3902	0.972471	0.925512	0.927074			0.788135	0.949541	0.926383	0.81927		0.917894	0.938819	0.982019	0.887762	0.971977	0.981692	0.79479	0.879373	0.970465	0.993491	0.944464	0.978894					0.437093	0.77433	0.711765	0.433775
hsa-mir-127			0.191667		3.92086e-06			0.447593		0.179488		0.69574			0.706313			0.193518	0.0689911	0.0740725					0.509433	-0.520836				0.11382	0.701493	0.729675	0.683581	-0.68789		0.415518		-0.349982	0.409715	0.387046						0.18182
hsa-mir-1271								0.326089	0.0650876		0.239649				0.224546			0.312497		0.374179			0.112147			-0.618512		0.488927	0.565062		0.59447	0.58961		0.351115		0.593168			0.346615	0.299078
hsa-mir-1285-1	0.473141		0.244059	0.428136	0.46947			0.217993		0.378621	0.0875692	0.377953	3.88967e-07	-0.267749	0.460489	0.274879	0.632861	0.567066	0.288165	0.513539	0.569069	-0.189655	0.542919	0.40624	0.291242	0.273573	-1.23084e-06	0.672779	0.189152	0.709507	0.00510551	0.521679	0.267079	-0.0946741	-0.0560614	0.42741	0.376962	0.539445	0.129019	0.624575	0.509011				-0.00967108	-0.313561
hsa-mir-1301	0.477478			0.620013	0.0596606			-0.069719		0.212155		8.19406e-07					-0.282358	0.287749	0.374459	0.635781					0.374756	0.0487995		0.286841	0.822592	0.475642	0.151265	0.628524	0.552584	0.316076		0.364915	0.853278	0.533521	0.430467	0.350776
hsa-mir-130a				-1.66634e-06				0.685259				0.799159			0.947118														0.852675			0.870053	0.701771	0.847458	0.491155	0.897913		0.715664		0.926127		-0.986735
hsa-mir-130b			0.276777											-7.62657e-07				0.128141	0.573912					2.57881e-06		0.265193	0.406251	0.269516	0.561015			0.619568	0.69212	0.531617		0.630667	0.546667	0.798347						-0.509479			2.93035e-07	0.0234366
hsa-mir-132
hsa-mir-133a-1	0.0599989			-0.0234611	0.493538	0.238634		0.0687813		0.333638	0.690722	-0.163034	-0.030708	0.514377	0.342069	0.533594	0.272864	-0.323147	-0.0961381	0.0382505		0.075226	0.137255	0.150903	0.317929	0.0928212	0.373134	0.107145	-0.102563	0.0725655	0.280036	0.402378	0.0202174	-0.16937	-0.17964	0.17722	0.134733	-0.198176	0.132758	0.0318549	-0.431019
hsa-mir-133a-2																																			0.402596
hsa-mir-134				3.67031e-06				0.156161							-1.39593					0.298077				6.93556e-07		-3.73136e-07			0.324323			-0.459003	0.48074	0.417438		0.319273	0.592001			0.364182	-0.00839163			0.558264
hsa-mir-135a-1	0.274651	-0.000476607	-0.000921513	0.251394	0.397627	0.170592	0.0657072	-0.407199	-0.154327	0.231753	0.121904	0.275455	0.302024	0.201845	0.256207	0.0946252	0.0915913	0.285107	0.180108	0.131545	0.0972624	0.13059	0.342748	0.067757	-0.0218554	0.174595	0.203747	0.420274	0.373258	0.182879	0.37488	0.168876	0.16452	0.145881	0.125945	0.222934	0.164344	0.156248	0.230643	0.0836124	0.204019	-0.100634	0.461715	0.262827	-0.509122	0.37262	0.122974	0.132881	0.145847
hsa-mir-135a-2
hsa-mir-135b											-1.16056e-06						0.0131585			0.458092									-0.0420019					0		0.765656	4.36854e-07
hsa-mir-136		-1.04031e-06						0.569536										0.432916										-0.0801715	-0.0909123			0.680506			-0.574715	0.86459			-0.179489
hsa-mir-139																																			3.43579e-07
hsa-mir-140										0.382715					0.417429	0.00287006		0.296963			-0.46684					0.572067			0.884663		0.764525	0.905934	0.227841	0.859779	0.486033	0.453913			0.792207	0.842334	-0.00027164
hsa-mir-141																											2.76802e-07									0.972233												-0.00181371
hsa-mir-142								0.22603							0.233047	2.52577e-06	0.588635	0.576271		0.843475			0.692672	0.872205					0.945617	0.962609	0.938847	0.767104	0.862331	0.964239	0.280461	0.856346	0.599202		0.798054	0.940665	0.669028		-0.770911				0.352297	0.596664
hsa-mir-143								0.788008			0.795501				0.592105				0.956569	0.933333					0.943773			0.748671	0.484808			0.880739				0.951038		0.931351						0.859622		0.705899	0.62421
hsa-mir-144			-3.37788e-06																-0.793111					-3.81818			-6.22494e-07				0							3.92727e-07		2.48616e-06						0.0741915
hsa-mir-145			3.1304e-07			0.517511	-1.70611e-06	0.548195	0.587963	0.697886				0.485795	0.482402				0.728697	0.857806		1.30206e-06		-0.201809	0.916258	0.738488		0.556433	0.623078	0.704408	0.785616	0.621146	0.81029	0.858		0.685501	0.790697	0.850426	0.837351	0.801826		-0.00248492		0.452935		0.953309	0.348552
hsa-mir-146a								0.765552		0.492062	0.4709	0.77528					0.609756			0.931634									0.933476			0.908786		0.956301		0.807259		0.901017								0.393176	0.0803149
hsa-mir-146b					-0.174329			0.20676							0.803729		0.797283		0.93977			0.701422			0.942907	0.900459				0.956846	0.900062	0.931588		0.953736	0.195789	0.942838		0.902821	0.7669		0.889228						0.47277
hsa-mir-148a											0.817561				0.641682					0.970671				0.927956					0.931505					0.985065	0.934609	0.983206								0.545019
hsa-mir-148b	-6.53164e-07		0.0330573		0.0645659			-0.684213		-0.148648	-0.300003	0.409577		-0.10274	0.835662	-0.139536	0.80454		0.366905	0.524629	0.0348091	0.26727	-0.429658	0.839904	0.541666	0.656085		0.895013	0.226336	0.772301	0.710808	0.529227	0.530497	0.596499		0.749939		0.472972	0.695324	0.743866			0.186911			-0.904303
hsa-mir-149																				0.0956521
hsa-mir-150								-1.07662e-07			1.47764e-06				-5.63946e-07			0.0444454	-8.9657e-08							1.45523e-06			0.421739			0.834802		1.47925e-06
hsa-mir-151a	0.457693		0.728889	0.66757	0.684194			0.210086		0.287357			0.701937		0.250876		0.32954	0.44638	0.67078	0.671159		0.80341	0.415151	0.814891	0.168627		0.444977	0.4657		0.890365	0.775182	0.648396	0.324284	0.389088	0.447802	0.724178	0.787709	0.734302	0.723727	0.757914							0
hsa-mir-152																		0.301586	-0.0695229	0.576636							0.438596					0.50495		0.839651	0.758334		0.81134
hsa-mir-153-1
hsa-mir-153-2																				1.09154e-06																0.780774
hsa-mir-155			0.758432	0.256485			-1.56983e-06	0.577579		0.613154	0.695568	0.801908			0.372088	0.467104	0.727921	0.612911	0.520777	0.160224		0.847955		0.827048	0.648341	0.336685	0.434343	0.607187	0.757652	0.728163	0.572137	0.589345	0.283839	0.0346304	0.482758	0.647669	0.480682	0.657045	0.581529	0.411172	-1.27244			0.609821		0.341374	0.659948
hsa-mir-15a								0.591717		-1.62318e-06				2.28034e-06			-3.83917e-06	0.0370337		0.467183				-0.231453		0.185716			0.541203	0.170353		0.1996		0.302746	0.399382	0.823956			0.364063		2.07542e-06
hsa-mir-15b				0.765623				0.228346	0.884793						0.934726	0.971215		0.879038	0.916331	0.931386				0.943375	0.921686				0.964884		0.910653	0.87223		0.943642	0.923119	0.950759		0.948295	0.96041	0.94803
hsa-mir-17				0.690249				0.889625	0.954679	0.863481					0.927308			0.918904		0.883562	0.901466		0.8446	0.958327		0.964928	0.959775	0.945334		0.977279	0.99446	0.953197		0.961239		0.966666		0.969302
hsa-mir-181a-2
hsa-mir-181b-1		0		0.0199989				0.211207	0.53896	0.347518	-0.0538858	3.76193e-07		-0.43182	0.363983	-2.8504e-07	-1.37273e-06		0.405772	0.211748		-2.39191	0.208396	0.65176	0.790456	0.728782	0.147154	0.35844	0.576994	0.649832	0.478174	0.0826848		0.149887		0.0749056		0.491178	-0.201757	0.403465
hsa-mir-181b-2
hsa-mir-181c															7.00674e-07					0									0.57421	-0.749997		-7.8657e-07			0.271929	-0.384617
hsa-mir-181d															1.88799e-06														0.139588							0.478992
hsa-mir-182																														-4.56268e-07		0.264704				0.48837		1.56855e-06	0.317075
hsa-mir-183											-1.34439e-06																									0.349876								-0.000373073
hsa-mir-185												-2.788e-07		0.194443	-0.291769		0.233765		0.603651	0.706091			0.389161			0.219672		0.728633		0.675675	0.671718	0.667105		0.0515007		0.596092	0.781787		0.576156	0.729982
hsa-mir-186	0.584986	0.781921	0.706456	0.697134	0.724836	0.712587		0.416329	0.606687	0.47076	0.660104	0.615383	0.800202	0.578023	0.63732	0.831942	0.765855	0.944604	0.839278	0.773648	0.659699	0.90903	0.617937	0.566032	0.782552	0.683812	0.550152	0.907238	0.732291	0.845786	0.75692	0.454824	0.796058	0.752697	0.901578	0.700463	0.889442	0.510497	0.660572	0.618719			0.388793				-0.173527		0.996893
hsa-mir-187
hsa-mir-18a			0.60519	0.132351	0.12327	-0.29933	0.157296	-0.143354	0.130618	-0.374207	0.398794	-0.475412	0.380082	-0.360849	0.588739	0.553987	0.045996	-0.195329	0.2716	0.0332753	-0.3288	-0.111766	0.40117	0.228418	0.192699	-0.100369	-0.0166325	0.692645	0.367751	-0.0522912	0.0955734	0.150806	-0.13385	0.205944	0.433006	0.167797	0.575998	0.0479039	0.395208	0.147896	0.252353		0.998346	0.565685	0.548546	0.317685	0.757297	0.36187	0.198203
hsa-mir-18b															9.60527e-07					0.690594
hsa-mir-1908					0.364												0.89075		0.916562	0.938376					0.94886			0.912816	0.99312			0.974191		0.980043		0.916148		0.982787	0.949039	0.912623		0.957761						0.998185
hsa-mir-191		0.319063		0.234567					0.288137									0.874598		0.958094						0.832199	0.306931	0.900843	0.882541		0.925871			0.985911	0.859003	0.918654	0.936749		0.922556		0.719162
hsa-mir-1915														0.0728469			0.693022				0.701259									0.6594						0.728137	0.928022
hsa-mir-192				0.673111	0.53202	0.37	0.680965		0.185278	0.71622	0.707501	0.735247	0.49187	0.658467	0.2642	0.907686	0.826513	0.719746	0.905133	0.6947	0.850084		0.863921	0.771244	0.874637	0.634923		0.611335		0.441261	0.537011	0.796649	0.822926	0.645677	0.723526	0.73862	0.955398	0.904078	0.713355	0.909096	0.53381						0.712667
hsa-mir-193a											9.86158e-07				0.461768			0.352938	0.790095	0.415532	0.717514				0.624839					-0.43899				0.543397	0.545538	0.316024	0.420682	0.925853				0.477676			1.57358e-06	-1.08318	0.466335		0.843336
hsa-mir-193b			0.640288		0.631579	0.470589			0.166668						0.447664	-0.234781	0.769159	0.885912	0.921723	0.779591			0.791375	0.533474	0.915254			0.760192	0.864386			0.838908	0.912224	0.945818			0.94626		0.946568				0.00444525
hsa-mir-194-2				0.50637			0.655463		0.150942	0.812909	0.631479			0.713442	0.764813	0.939502			0.962826	0.918633		0.783593	0.928602	0.94451	0.958084			0.850914		0.916649		0.951606	0.936788	0.953458	0.987841	0.965125	0.9871	0.910229	0.723584	0.982913
hsa-mir-195			0.643229					0.489362							0.784482					0.846383					0.559471		0.708333					0.86258		0.850586
hsa-mir-196a-1
hsa-mir-196a-2			5.03845e-06																									7.81119e-07		-0.133334					-5.36116e-07	0.49711
hsa-mir-196b																																				0.332506
hsa-mir-197		0.169261	0.789695		0.22982	0.434251	-0.657769	0.240484	-0.100723	0.434537	0.593504	0.665347	0.414882	0.657396	0.372794	0.59941	0.432286	0.51545	0.665864	0.597771	0.630548	0.577222	0.495856	0.539346	0.632432	0.84861	0.137104	0.642686	0.751088	0.520752	0.4334	0.568195	0.552808	0.58659	0.769391	0.551465	0.584916	0.313015	0.643207	0.694212	0.5442		0.795158	-0.000840398		0.106186	0.245961	0.448675
hsa-mir-199a-1	1.90332e-06			-0.228586	0.00351437	0	0.282166			0.0425232	0.335527				0.355519	-0.27072	0.112499	-0.564875	0.294988	-0.364674		0.3433		0.443996	0.0183322	-0.65752		0.175206	-0.174542	0.228705	-0.086718	-0.0782049	0.431657	0.754443	-0.0119611	-0.411321	0.151605	-0.106296	0.0317649	0.113462	0.980188			-0.807319		5.28515e-07
hsa-mir-199a-2			0.621951	0.336033	0.829426	0.225771		0.752534	0.688699	0.247165	0.464473				0.818316	-0.0884972	-0.0261047	0.73574	0.727545	0.834642	0.662252		-0.448616	0.80887	0.529654	0.622825	0.00730994	0.704361	0.468202	0.471928	0.340346	0.603801	0.676809	0.234483	-0.666667	0.356942	0.563682	0.648402	0.239923	0.503459	-0.315275	0.00820829	0.0545183	0.19205	0.589826	-0.316244	0.331122	0.365014	-0.0708864
hsa-mir-199b								2.4868e-08							-3.75964e-06					0.44474										1.07845e-06				0		6.41512e-07			-1.51448e-06	-4.56948e-06
hsa-mir-19a	1.4424e-07		0.229499		0.621937			0.715634	0.759982	0.721394	0.400373	0.704021	0.791955	0.673042	0.295963	0.617925	0.685129	0.6944	0.663403	0.852579	0.793259	0.641428	0.665497	0.43698	0.771351	0.531667	0.765925	0.868595	0.689163	0.660679	0.569237	0.656542	0.563486	0.70222	0.411988	0.497719	0.40099	0.542188	0.696337	0.905204	-0.0458751			0.306162	0.607944			0.76645
hsa-mir-200a			5.54935e-07					-8.11038e-08										-0.152599											0.0460511	0.29054	-5.8998e-07			0		0.206273
hsa-mir-200b					3.66293e-06																															0.383272
hsa-mir-200c																																			1.41913e-07	0.97976
hsa-mir-202																														-1.92581e-06
hsa-mir-203a																																2.80317e-06
hsa-mir-204															0.133334					0.958814			0.893016												0.382838	0.133892
hsa-mir-205
hsa-mir-20a								0.484571	0.832916		0.717073				0.934227			0.111259						0.910567	0.973957					0.954946		0.867929		0.972663		0.977787			0.719609				-0.000175615	0.836854
hsa-mir-20b																				0.911731									0.0176447							1.59007e-06
hsa-mir-21	0.972881		0.942197	0.975924	0.970634	0.994717	0.943246	0.864024	0.941649	0.993641	0.954423	0.98893	0.992889	0.982541	0.865025	0.980797	0.944316	0.990632	0.994619	0.968805	0.984465	0.986918	0.990771	0.97906	0.993866	0.984615	0.956672	0.996784	0.984014	0.968997	0.984999	0.953977	0.977284	0.952543	0.990833	0.980772	0.993422	0.990322	0.989041	0.988902	0.872256		0.779013	0.914099	0.917209	0.837998	0.879041	0.883083
hsa-mir-210															1.4247e-07					0.55221				0.130434					0.816176						0.640288											-3.95066e-06	3.05842e-07	-3.18481e-06
hsa-mir-211																																		0.415205
hsa-mir-212
hsa-mir-214			0.127662	0.122052	0.481168			0.429402	0.624346	0.601214	0.151111		0.553985	-0.374623	0.323914	-0.376002	0.0922643		0.492258	0.820172	0.213415	-0.690757	-0.110197	0.196611	0.922556	0.715482	0.627189	-0.215862	0.771583	0.257261	0.699518	0.628648	0.507817	0.290441		0.573422	-0.0224257	0.803366	0.157793	0.418911	0.431961	0.282369	0.277044	0.596422		0.233729	0.699648	0.227887	0.274222
hsa-mir-215	0.213595	3.48345e-07		0.139182	0.40376			0.36553	9.83742e-07	-0.456164	0.282003	-0.374418	0.485981	0.56401	0.197032	-0.151765	0.146614	0.146278	0.524721	0.396878	3.09878e-06	0.0823909	0.46768	0.408306	0.310128	0.613418	-0.484036	0.540717	0.314251	0.527666	0.351814	0.419961	0.322703	0.229419	0.36142	0.468466	0.551242	0.504866	0.216774	0.297882	0
hsa-mir-216a								-1.49702e-06										-0.108011		0.446282								-0.0486151
hsa-mir-216b																		0.409607		0.247472		0.78343						0.0111157	0.507771						0.714948			0.280001	0.787879
hsa-mir-219a-1	0.543379	0.677064	0.226646	0.107142	-0.107141	-0.23077	0.29752		-0.475004	0.494899	0.262849	-0.48459		0.541806	0.623627	0.138196	0.113255	0.479495	0.52337	-0.276775	0.346771	0.589145	0.236671	0.422223	-0.581426	-0.0075565		0.381029	-0.180433	0.405513	0.34245	0.000618037	0.762983	0.0729982	0.828074	0.458051	0.647698	0.612513	0.485128	0.685674	0.000484102				-0.775091		0.263095
hsa-mir-219a-2															0.525533	1.15323e-06	2.77287e-06		0.445316	0.0745111					0.614458			0.139208		0.687943				0.321726	-0.371429				0.0276342	0.796749
hsa-mir-22	0.516118	0.0693653	0.280175	0.421648	0.604673	0.346614	0.221984	0.191045	0.116554	0.632107	0.433091	0.294601	0.534915	0.0075223	0.405902	0.237026	0.104342	-0.0626509	0.493145	0.245291	0.400605	0.267686	0.296147	0.227274	0.329618	0.399457	0.379007	0.523187	0.214384	0.180728	0.475173	0.3692	0.0834249	0.256176	0.0328607	0.591942	0.333775	0.687576	0.230492	0.59115	-0.163048	-0.264893	0.128944	0.103256	0.229171	0.105243	-0.00424522	0.351139	0.191995
hsa-mir-221			0.847328					0.825569			0.904352		0.775994	0.763576	0.863053				0.919083	0.899875			0.910011		0.960915				0.795869		0.813867	0.983632		0.906917		0.974491	0.779252	0.96301	0.876125	0.919504				0.255305			0.667821
hsa-mir-222								0.817351																			-5.41569e-07		0.820716	0.909747		0.966827					0.905749		0.935281	0.940985
hsa-mir-223				0.534161	0.390244	0.72063		0.706504			0.818628	0.422309		0.562083	0.638484			0.469663	0.88617	0.854651	0.613863	0.520752	0.889564	0.618242	0.870571	0.826903			0.754883	0.826725	0.711739	0.851242	0.670816	0.879795	0.561577	0.760555	0.88481		0.676793	0.851998	0.641989	0.99853	0.582875	0.824761	0.648285	0.841943	0.775939
hsa-mir-224	0.754601			0.947584	0.9718			0.732704	0.807418	0.97367	0.957918		0.978506		0.714388		0.956888	0.973836	0.965848				0.957529	0.921563	0.922163	0.945281	0.910803	0.986535	0.85042	0.914908	0.982911	0.958072	0.915084	0.925043		0.939636		0.932337	0.978939	0.985982							0.577556
hsa-mir-23a			0.522012	0.519957	0.664295			0.281097	0.5863	0.100916	0.713836	0.558912			0.347522		-0.522632	0.671187	0.754765	0.468938		0.284818	0.768246	0.0436949	0.465466	0.797571	-0.939594	0.730692	0.484095	0.841207	0.419115	0.808758	0.635634	0.623219	0.43928	0.569358	0.365413	0.555517	0.429459	0.739323	0.0932215	-0.0199445	0.398284		-0.795048	0.0196089			0.039863
hsa-mir-23b			0.94411		0.928949		0.926485	0.729587	0.75094	0.976284	0.943217	0.961494	0.963011	0.968958	0.854028		0.9484	0.981371	0.98605	0.970268	0.944068	0.944416	0.988558	0.943865	0.974412	0.987835	0.972841		0.92564	0.971535	0.979168	0.921998	0.959846	0.941863		0.973494	0.983665	0.988959	0.993931	0.993825	0.682391		0.643887	0.851157		0.81172	0.999488	0.837638
hsa-mir-25		0.237503	0.142978	-0.0652407	0.430487	0.395122	0.227572	0.0531912	0.121231	-0.446405	0.497599	0.299345	0.667532	0.320132	0.351006	0.479006	0.208433	0.699967	0.0405683	0.304475	0.567584	0.454846	0.45702	0.308135	0.109721	0.0588293	-0.198335	0.483371	0.284168	0.15274	0.176309	0.129789	0.0661327	0.15811	0.412993	0.424705	0.25899	0.26829	0.493899	0.166857	-0.0537255	-0.684632		0.439495	-0.027054	-0.357065	-0.407952	-0.504688
hsa-mir-26a-1
hsa-mir-26a-2
hsa-mir-26b			0.684418							0.850969				0.817205	0.818147		0.952996	0.932818	0.951521	0.977475		0.78761	0.937028	0.859093		0.870298			0.922682		0.859216	0.804048	0.879619	0.94779		0.96942	0.941032	0.852521	0.94611	0.988905			0.285788
hsa-mir-27a			0.135592	-0.0845176	0.575			0.612121			0.613301				0.695524	0.606557	0.343881	0.135863	0.581162	0.464204	0.656398	0.21875	0.597374	0.119498	0.265009			0.710825	0.776928			0.643508	0.0152974	0.473404	-0.226012	0.866843	0.377457	0.747835	0.553655	0.713601	-0.139912		0.502911		-0.112411
hsa-mir-27b			0.903146		0.900021			0.551723	0.631199	0.96557	0.957976			0.984947	0.759609	0.991067	0.973596	0.955304	0.988313	0.960583	0.912284	0.970936	0.95793	0.893162	0.978449	0.985048	0.869771	0.980588	0.981933	0.981263	0.970286	0.895678	0.987507	0.953395	0.973991	0.973846	0.983585	0.979879	0.989267	0.993873	0.961568		0.748026	0.758598		0.897063	0.977748	0.886148	0.557483
hsa-mir-28			0.156092		0.856528	0.51861		0.3134		0.806876	0.754697	0.755223	0.572389	0.597647	0.883566	0.843841	0.611587	0.86413	0.760096	0.821269			0.852354	0.276369	0.748231	0.638879	0.671739		0.80001	0.659422	0.912236	0.836964	0.854378	0.874587	0.736959	0.806253	0.784182	0.928678	0.908394	0.837478				0.0091391
hsa-mir-296										5.2646e-07															0.0389562										-0.330847	0.64247
hsa-mir-29a			0.72411	0.738904	0.51601			0.773148			0.133425			0.92974	0.86828		0.880698	0.623448	0.94486	0.955563	0.814454	0.825447	0.682982	0.745956	0.966895		0.784397		0.796774		0.964861	0.886486	0.88236	0.928406		0.940533	0.89199	0.926124	0.848278	0.966634			0.159729	0.74453	0.168918	0.670867			0.546201
hsa-mir-29b-1
hsa-mir-29b-2																																							0.51678
hsa-mir-29c	0.611111	0.206522	0.358093	0.114335	0.25978	0.550992	0.635827	0.323988	0.127902	0.874522	0.432849	0.760255	0.338491	0.606874	0.603011	0.284962	0.369484	0.431818	0.522785	0.530204	0.473936	0.464171	0.450552	0.556616	0.512642	0.263368	0.557639	0.175414	0.608924	0.393727	0.504539	0.498968	0.345553	0.438497	0.601118	0.649123	0.801658	0.658163	0.446522	0.474855	-0.382683		0.580646	0.358403		0.197559	0.421305	0.310192	-0.0882567
hsa-mir-301a										-1.83509e-06				0.835797				0.901825	0.94229	0.949161						0.868121			0.971701			0.824112		0.60199							0.62137
hsa-mir-302a			0.348484	-0.107484		-0.413639			-0.0697689	0.420832	0.336205	0.51558	-0.948274	0.106711	-0.355243	-0.739163		0.00568329	0.641232	0.599426	0.278201	1.68224e-07	0.422515	0.195207	-0.116677	0.429519	0.481012	0.483057	-0.0597682	0.715107	-0.887481	0.0818792	-0.0815922	0.0292071	0.0752656	0.201152	0.00470978	0.229363	-0.0132907	0.173337	0.364554			0.279376		-0.0205868
hsa-mir-302b	-2.85446e-06	0.232558		-0.0430034	0.319728	-1.57092e-06	0.346537	-0.409202	-0.130001	0.336299	-0.168682	0.543241	-1.32868	0.351996	-0.0883026	0.246812	-0.0204036	0.308236	0.0114787	0.117869	0.411766	0.335593	-0.282714	0.168772	-0.110346	-0.126555		0.000517488	0.267866	-0.0183339	0.00559826	0.327433	0.373684	0.232923	0.106004	0.18498	0.0202116	0.210187	-0.124266	0.0448387				-0.271209		0.0500718	-0.156167	0.997273	-5.42424e-05
hsa-mir-302c	-9.37562e-07		0.176079	-0.0372754	-0.00167421	0.136578		0.282609	0.133084	-0.160121	-0.639152	-0.0137093	0.425605	-0.382766	0.295117	0.452051	0.255415	-0.298436	-0.667315	-0.02847	-0.0411133	-0.293308	-0.205519	0.0224353	-0.380788	-0.469058		-0.238316	-0.685762	0.158084	0.490033	-0.0272058	-0.246136	-0.424337	0.182391	0.0658158	-0.662373	0.0145841	0.195675	0.138224	-1.01892		-0.000106826	-0.121182			-0.235818	-0.707979
hsa-mir-30a									0.466193						0.925932														0.980598			0.960886		0.97573	0.898271
hsa-mir-30b				0.940084	0.983425	0.825438				0.940423			0.939668		0.949603	0.96984	0.931903		0.960702	0.913185		0.948038	0.953244	0.957606	0.949313	0.876256	0.96735	0.976295	0.737788	0.948896	0.921141	0.971081	0.978007	0.871864		0.977358		0.954288	0.971558	0.886979
hsa-mir-30d					0.929577			0.592593			0.796993									0.944321				0.967787		0.913194			0.933555	0.970078		0.963249		0.974972		0.935823			0.957307
hsa-mir-30e				0.723122				0.381294	0.125927	0.852181					0.902426		0.935818		0.904964	0.858143				0.794587	0.963134	0.878278			0.885703			0.894018	0.781573	0.945023	0.965538	0.929231		0.942636	0.910852	0.970984			0.225971				0.60295
hsa-mir-31								0.270073																		-0.348028									1.27169e-06				0.747957
hsa-mir-32	0.440864		0.756217	0.788609	0.892473				0.678188	0.745638	0.738562			0.830076	0.907058	0.939329		0.894246	0.793246	0.858104	0.899666		0.936082	0.58228	0.828129	0.846375	0.504517	0.933753	0.764329	0.829957	0.962053	0.917068	0.781848	0.756128	0.782451	0.839616	0.976306	0.888306	0.954277	0.916908
hsa-mir-328	0.822222		0.80324				0.909601	0.705		0.822686	0.923225				0.957115	0.98444	0.988657	0.987898		0.832053	0.886715	0.98203		0.939976		0.973316	0.746852	0.882107	0.953485	0.993313	0.989693	0.966302	0.968772	0.92805	0.967238	0.984462	0.94593		0.952696	0.980937	0.85085		0.679336				0.943029
hsa-mir-330				8.71703e-07				0.473374									0.168703			0.320874				-1.43849e-07		0.481782		0.776371	0.196126	0.630873	-0.358269			-0.499999	0.0231337	0.397459			0.490252	0.159547									-0.000137385
hsa-mir-331				0.883844	0.675851			0.621495	0.145944		0.711004				0.862278	0.77641	0.800592	0.850302	0.922389	0.932494	0.795185	0.473833	0.581628	0.79668	0.955036	0.760305	0.774521	0.897858		0.908635	0.941699	0.850625	0.807049	0.853821	0.918122	0.878456		0.911256	0.948156	0.867098		0.371213	0.0011449	0.633151			0.472189
hsa-mir-335																0.871409				0.911387			0.178808			0.765605			0.904352	-0.0773066						0.824829				0.511896
hsa-mir-337										2.83269e-06	-7.6507e-07							0.632875	-0.108336														-0.142309	0.470588	-2.22546e-06			0.345783
hsa-mir-338														6.78672e-07	0.564866			0.484302		0.606557									0.548128	0.453782					0.103658		0.407408		0.746099	0.294673
hsa-mir-339																0.899575	0.6843			0.969582	0.538462					0.863201									0.931828				0.971863						-2.0736e-06	-26.7501
hsa-mir-33a								0.691683							0.910414												0.328622								0.967244
hsa-mir-33b																																0.932874											0.996289	0.996484				0.98617
hsa-mir-340			0.267124		0.787992					0.607439					0.654686				0.92029	0.781175					0.251246	-0.00216039	-0.625003	0.551122	0.596643	0.446353		0.340018	0.908054	0.433103				-0.319012	0.711232	0.916807	-5.65202e-07
hsa-mir-342								0.897959							0.919679		0.786219							0.803021			0.50156		0.959887	0.764069					0.130921				0.981477
hsa-mir-345					-2.1959e-06														0.858717					0.69217	0.794445	0.875428	0.676375		0.846153	0.772042		0.768568		0.793742				0.759446	0.730372	0.445682
hsa-mir-34a					0.871217					0.492873	0.726481	0.784553			0.657281	0.895005	0.673331	0.792818	0.939126	0.955177		0.615471	0.96207		0.950889	0.638508			0.897509	0.798716		0.940834		0.852075		0.861103	0.839718	0.941533	0.917928	0.84004						0.995967
hsa-mir-34b
hsa-mir-34c			7.27317e-06																				0.417266																-3.99785e-07
hsa-mir-361			0.622768																													0.965683		0.961509	0.907524
hsa-mir-362								0.323943											0.87559	0.864138				0.717971	0.781411	0.888455						0.844843		0.921661
hsa-mir-363																								1.91799e-06						7.52841e-07
hsa-mir-365a	-2.02909e-06	1.23606e-07	0.538474	0.329546	0.109946	-4.50728e-07	0	0.601796	0.0537628		-0.216		0.378486	0.241133	0.417308	-0.201514		0.593581	0.630711	0.543176		0.325793		-0.0551893	-0.0332092	0.781587		0.336801	0.605645	0.780529	0.63698	0.572728	0.569203	0.606237	0.824111	0.502422		0.66734	0.641472	0.553637		0.997141
hsa-mir-370								0.0756319							0.270109			-0.780964		0.191388	0.0384647				0.207548				0.739058			0.191189	-0.369062	0.665529		0.0951513		0.38092	-0.456313	0.861603					0.00149902	0.154895
hsa-mir-372															-2.60282e-07								8.0255e-07							-0.456191						0.677166			-0.347548
hsa-mir-373														-1.26685e-07								1.72667e-06														5.21116e-07			0.0288523
hsa-mir-374a						1.74546e-06		0.539473	-0.0400007	0.733334	0.688588		0.341605	0.56606	0.684229	0.769231	0.716952	0.732091	0.858758	0.88738	0.516287		0.564367	0.690973	0.73947	0.789393			0.871107	0.737225	0.737917	0.542938	0.728737	0.475557	0.71118	0.712571	0.927434	0.743259	0.733001	0.924252	0.418197
hsa-mir-376a-1								0.606413				1.44e-06																				0.394958					0.21839			0.396826
hsa-mir-376a-2								0.637317							0.508051									-4.40353e-07		0.219512								0.470422	0.066667			0.145114		0.216903
hsa-mir-376b					-9.78174e-07			0.698823			0.260001				-0.437272					0.549342												0.516704		0.666549	-3.69474	0.840821	-0.585904	-0.480718		0.193878
hsa-mir-376c								0.666666							0.629191												2.20548e-06								0.135203
hsa-mir-378a	1.89947e-07	0.573426	-0.00869409	0.34054	0.724274			0.286548		0.723948				-0.132583		0.439446	0.0988392	0.296625	0.541617	0.670451			0.589623	0.7215	0.613214	0.528178		0.90575	0.774879	0.505698	0.628294	0.356286	0.442214	0.50634	-0.00214939	0.605871	0.546231	0.609692	0.831345	0.819895								-0.0251211
hsa-mir-378b
hsa-mir-378c
hsa-mir-378e
hsa-mir-378f
hsa-mir-378g
hsa-mir-378h
hsa-mir-378i
hsa-mir-378j
hsa-mir-379					1.79332e-06																								-0.222929				0.812022		-0.448717
hsa-mir-380								0.0903069		0.346302	0.172131		-4.33825e-07					0.520161	0.19192				-8.50919e-08			-2.86829e-06				-1.4886e-06			0.146471			0.100014				-0.157694
hsa-mir-381						0.0364977		0.74543		-0.519017					0.552972			0.872354	2.52878e-07				-1.51275e-07		0.296296		0.0990985					0.230769	0.403706	0.308149		0.404399	0.547447	-0.0278085		0.391482				0.163011
hsa-mir-383												0.342105			0
hsa-mir-409						0.41		0.558823							0.278688			0.904306						-5.04406e-06						2.24677e-07			0.466667	0.338491		0.558823				0.22144						-8.92719e-07
hsa-mir-423	0.718984		0.693251	0.918963	0.890231			0.772554	0.882767	0.887514	0.88354	0.847561			0.946222		0.864966	0.909398	0.97623	0.979669	0.878759		0.971427	0.916122	0.983326	0.911727	0.827693		0.948587	0.938115	0.954826	0.936573		0.979785	0.951683	0.971157	0.987545	0.970471	0.9731	0.986961	0.73311			0.764277			0.625645	0.443847
hsa-mir-424								0.808219																															0.934631
hsa-mir-433					0.24161			0.582682		-0.65909	0.150066			3.80056e-06	0.44234			0.251612	0.625537				0.129497				-2.6205e-07	-2.09265e-06	0.515038	-4.12626e-06		0.182797	0.724851		-0.223215	0.596404		0.724062	0.0784716	0.261072	0.267975			1.02406e-06
hsa-mir-449a																																				1.24336e-06
hsa-mir-449b																		1.37766e-06									0									-8.56087e-07
hsa-mir-454				0.0396606				0.618619					-2.1356e-06	0.0956549	-0.122676	0.458332	-3.03556e-06	0.774237	0.776792	0.508229				0.599871	0.36596	-0.0979156	1.34881e-07	0.452488	-0.125372	0.415376	-0.0141675	0.25505	0.724625	0.141855	0.718591	0.626654	0.372427	-0.463726	0.732139	0.157026
hsa-mir-483			0.406844								-0.525181	0.0910777			0.507184				0.654916					0.673972	0.749442								0.113636	0.458095		0.34105	0.204082							0.979757
hsa-mir-485						-2.31217e-07		0.602086			0.338031							0.824715											0.451457			0.509293	0.722805			0.805328								0.496276
hsa-mir-486-1																														2.2122e-06					2.51077e-07
hsa-mir-486-2																														2.8459e-06					-1.36e-06
hsa-mir-487b								0.113755			3.48517e-08				0.169894														-3.2741e-06		-3.25245e-07			0.827851				-1.5		0.58466								-6.94493e-07
hsa-mir-488																		0.230159					-4.05545e-07						0.537899	0.34965
hsa-mir-489																																			-2.59049e-06
hsa-mir-490																		0.287304		0.212292						-0.438773	-0.674417	0.434897							0.0564436	-9.46104e-07
hsa-mir-491					0.570377	-0.322223		0.0417535		0.622392	0.762803	0.750351	0.736843	0.707958	0.111344			0.861252	0.625532	0.794253			0.701805	-0.49163	0.650357	0.807891		0.767659	0.906456	0.531999	0.683871	0.684097	0.66374	0.681867	0.659558	0.523663	0.636615	0.669295	0.824919	0.787785			-0.447948		-6.78801e-07	-0.000190966	-0.175079
hsa-mir-493								-0.503032		-0.264157					-0.316458											6.99267e-07			0.13669				0.0762977			0.569123			-2.55419e-06									1.20321e-08
hsa-mir-494								0.46883							0.434836										-5.21004e-07				6.85387e-07	0.469827		0.584312		0.32871			0.500002	0.731523		0.57913
hsa-mir-495																													0.128203
hsa-mir-497								0.732143												0.953513									0.892184	0.711399			0.71001	0.906268										0.419409
hsa-mir-499a	0.258622	0.124999	0.411764		0.351092	0		0.33585	-2.45936e-07	-0.346652	0.635732	-0.622219	0.415179	-0.285954	0.0388347	0.585732	0.530457	0.700618	0.490471	0.726961	0.0490811	0.346011	0.178081	0.636941	0.703623	0.641892		-0.00301186	0.55515	0.0757176	-0.86656	0.0999882	0.0246529	0.433534	0.480378	0.182236	0.0539257	0.688303	0.34373	0.145568						-3.5792e-07	-0.0163409
hsa-mir-502	0.130436							-4.49105e-08				0.265487	-3.36069e-06		1.93353e-06	-1.14067e-06				0.391893									0.812198	-0.0705897	0.446654	-0.263158		0.306666	0.466278	0.390625							-1.52256e-07
hsa-mir-503								0.774108							0.792703															0.284552		0.720962				0.872439			0.867683
hsa-mir-504																														-0.54054					0.518241
hsa-mir-506								-4.01328e-07		0.0981408	1.20892e-06				0.378006		0.343478		0.106669	0.244215		-3.05987e-07				0.560969			0.557377	-0.306873		0.211653			0.132472	-0.00400319		0.236111		-0.0203838			1.2357e-07					9.13801e-06
hsa-mir-508						2.38145e-08				0.2432					0.781413		0.585715			0.655161		1.16831e-06			0.707746	0.058762				3.29526e-06		-0.0183173			0.639213	0.145473				-0.37374							0.0012536
hsa-mir-509-1										0.600155	0						0.711404					-0.416667				0.620723		0.647619				0.864504	-3.93349e-07		0.142397	0.535221				0.0507436			-0.000158353
hsa-mir-509-2				2.76731e-06						0.677496	-2.57903e-06				-0.142325		0.107074	-9.11767e-07		0.382231						-0.2661		-1.94286			-7.20714e-07	0.624653			-0.539043	0.147899				0.338164			0				-0.492092
hsa-mir-509-3				0.413224				0		0.403138					0.340887		0.157525			0.621623						-0.486382		4.83102e-07			0.584639	0.540651			0.103887	0.304469		0.00833235		0.84407			0		1.98902e-05
hsa-mir-511			0.713656		0.813235			0.590558	0.570651	0.824907	0.838945	0.901707	0.891186		0.66881					0.90894	0.761378	0.924091	0.776113		0.719113			0.777079	0.949027	0.929024	0.809311	0.7922	0.943102	0.810969	0.775809	0.893412	0.787153	0.76915	0.884436	0.87415			0.978053	0.966975			0.953047
hsa-mir-512-1																													-1.51967e-06
hsa-mir-512-2																											0.51952		0.500001
hsa-mir-513a-1										0.212144					0.452088		-0.0371536		1.31496e-06	0.316868						0.484945						0.544181			0.485134	0.282642				0.481855
hsa-mir-516a-1																																			-0.21875
hsa-mir-516a-2
hsa-mir-519a-1																													0.0114944						0.342886
hsa-mir-519a-2
hsa-mir-519b																											0.545455
hsa-mir-519c																											0.59292	0.707317	-1.12767e-06
hsa-mir-519d
hsa-mir-519e																																			-0.178133
hsa-mir-520b																		0.267243
hsa-mir-520c																														-2.84326e-07
hsa-mir-520e
hsa-mir-520h
hsa-mir-524
hsa-mir-542									0																			1.75752e-06	-0.427688
hsa-mir-548a-1
hsa-mir-548a-2
hsa-mir-548a-3				0.62949		0.0634902		0.568966						-3.06969e-07	0.587412			0.733774	0.601809	0.197018	0.532346	0.561708				-0.0370354	0.774011	0.666667	0.76428	0.245664	0.65684	0.733111	-0.212359	0.0222229	0.567146	0.0266655	0.588517	0.626617	-0.09091	0.838527
hsa-mir-548aa-2	0.36154			-8.30193e-07	0.685			0.346656			0.360658				0.283051			-0.190435	0.485294	0.393706			0.345556		0.251034	0.00433852		0.480713	0.659427	0.698493	0.193576	0.832215	0.815328	0.751773	0.435027	0.595958	0.682092	0.769691	0.575945	0.211494
hsa-mir-548ab
hsa-mir-548ac
hsa-mir-548ad
hsa-mir-548ah
hsa-mir-548ai
hsa-mir-548ak
hsa-mir-548al
hsa-mir-548am
hsa-mir-548an
hsa-mir-548ao
hsa-mir-548ap
hsa-mir-548aq
hsa-mir-548ar
hsa-mir-548as
hsa-mir-548at
hsa-mir-548au
hsa-mir-548av
hsa-mir-548aw
hsa-mir-548ax
hsa-mir-548ay
hsa-mir-548az
hsa-mir-550a-2			0.248225	0.450979	0.824352	0.0111506		0.578001		0.675891	0.694502	0.625467		0.415861	0.704172	0.835403	0.801827	0.67746	0.732382	0.834255		0.693495	0.616018	0.876884	0.9014			0.637022	0.768513	0.911078	0.703067	0.642996	0.689648	0.522141	0.439649	0.656503	0.773423	0.821923	0.900731	0.769466							3.63589e-07
hsa-mir-550a-3			0.714285		0.835662	-0.0708658			0.35065		0.408288		0.563725	0.363058	0.7856	0.824188	0.626192	0.514961	0.591357	0.863637		0.465278	0.85676	0.830793	0.795812	0.599581		0.350946	0.268267	0.417302	0.731641	0.67604	0.849491	0.594944	0.632049	0.904567	0.661781	0.767749	0.76683	0.822279							0.333776
hsa-mir-574			0.181819		0.425781	-0.0616629								0.474004	0.439232	0.657535	0.776286	0.524929	0.583683	0.876761	0.679122	0.750733	0.706175	0.706075	0.71983	0.746691	0.721836	0.771987	0.871665	0.639689	0.880905	0.827995	0.785675	0.709529	0.921198	0.403179	0.575921	0.855639	0.958686	0.906194	0.708296		-0.000346897		0.28244	0.678658	0.20074	0.89315
hsa-mir-580			0.333335							-1.50708e-06		0.0181803		0.514753		0.561114	0.348624		0.593194	0.522871			-0.168307	0.566711	0.560692	-0.169035		0.759578	0.483527	0.0844137	0.392528	0.726028	0.419722	0.702998	-0.251656	0.523681		0.848924	0.253784	-0.614765			-0.0605445
hsa-mir-582	6.61809e-07						-9.11929e-07			0.542689					0.687956				0.390122	0.911465					0.258255			0.796537	0.111112	0.188888				0.694915		0.765958		0.872425	0.761479	0.834791				-0.0767862
hsa-mir-584					-2.4524e-07						-9.05405e-07						1.09309e-06		5.06905e-06	-0.196387			-2.59098e-07		-2.91763e-06					0.0229012		-1.25809e-06				0.187817				-0.600806
hsa-mir-590	0.588843	0.204551	0.323673	0.48141	0.246929			0.717991	-0.241376	0.398797	0.735894	0.619051	0.333333	0.650612	0.519236	0.828331	0.605355	0.791679	0.693259	0.410357	0.528372	0.744949	0.765742	0.52324	0.51406	0.519562	0.457123	0.892525	0.702479	0.497423	0.58396	0.382794	0.833494	0.502215	0.668448	0.619595	0.865745	0.649685	0.517817	0.616039	0.30564			0.405269			-0.540794	0.348357
hsa-mir-593	-0.850813		0.369232	0.721448	0.224437	0.210885		-0.642109		0.40227	0.108288	0.203123		0.229499	0.196759	0.220782	0.626414	0.353328	-0.340354	0.481141	-0.94173	0.530831	0.293493	0.150631	0.093608	0.36154	-0.197556	0.207566	0.142677	0.375123	0.541407	0.423671	0.190064	0.109154	-0.253711	0.217393	0.280133	0.452638	0.265477	0.361962	0.889633	-0.00101314		-0.745321	0.147946	0.364939	-0.832494		-0.0204636
hsa-mir-615
hsa-mir-616	0.687475		0.640191	0.370787	0.223829			-0.452103	0.634756	0.330953	0.658387	0.485356		0.363256	0.619574		0.661207	0.369963	0.464069	0.665188	0.488396	0.703243	0.342105	0.73857	0.742027	0.879134	0.549241	0.746402	0.641894	0.719539	0.62253	0.71942	0.741305	0.601414	0.55709	0.699183	0.542934	0.646264	0.643296	0.651928	0.566022	-0.0889325	0.0734987	0.851829			0.467951	-0.0439355
hsa-mir-625	6.61809e-07							0.0202707					0.447369					0.691297									-2.25654e-06	0.661538	0.744157	0.117968						0.935159		0.212365	0.900349
hsa-mir-629			0.581396		0.803776						0.236365	0.391499			0.63853		0.117477	0.818348	0.931177	0.803179	0.441049			-0.155439	0.780558	0.892934		0.754098	0.859109			0.860648	0.616834		0.744084	0.889979		0.842209	0.920553	0.94107
hsa-mir-642a	1.14255e-06										0.147369								0.492808	0.446303		-0.0277777						0.384341	0.631501	9.61862e-07			0.729805					-6.69274e-07
hsa-mir-642b	5.31876e-07										0.147372								0.492807	0.446923		-0.0783242						0.397213	0.64051	0			0.729805					-6.69274e-07
hsa-mir-664a	0.259178		0.0811224	-0.00226925	0.433802	0.251716	-1.07912e-06	0.102022		-0.040437	0.57143	0.188403	-0.0100495	0.351493	0.222149	-0.0818619	-0.371182	0.124179	0.258497	0.469257	-0.112188	0.0773946	0.160732	-0.185528	0.0566299	-0.102618	0.273524	0.237618	0.316204	0.175882	0.0885285	0.407842	0.449993	0.379979	0.236765	0.172122	-0.0452296	0.22429	0.28826	0.126453	0.476313		0.748381	0.430288	0.589137		0.225154
hsa-mir-675	-0.242931	0.109731	-0.250373	0.150553	-0.116546	-0.0885277	-0.0474304	0.395409	0.141628	-0.249856	-0.294894	-0.299902	-0.0666634	-0.445196	0.156588	-0.0342551	0.196543	0.0137962	-0.0605534	0.00687522	-0.024293	-0.0633453	0.0424229	0.231318	0.0571332	-0.0661094	-0.0740927	0.29297	0.117931	0.193205	0.146351	0.0373108	0.243509	-0.065212	-0.210558	0.00580253	-0.0592891	0.058848	0.037618	-0.088291	-0.0617551	0.0258624	-0.221052	-0.222787	-0.0387267	-0.0164971	-0.255536	-0.116482	-0.150196
hsa-mir-708								-0.621622												0.348259															0.709444
hsa-mir-874			6.4777e-07		0.553571								-3.01661e-06					0.0413072		0.0939743	0.521913		-0.386576		0.226992		3.38481e-07	0.492103	0.743541		0.626277	0.28105	0.830044	-0.401899	-0.197583	-0.103598	-0.83804	0.697495	0.647934	0.746613							-1.1821e-06
hsa-mir-885										0.398056	0.205482	0.607025			0.0306236	0.705169	0.553097		0.881838					0.794335	0.819882	0.760479	0.546538	0.883177	1.08219e-06	0.196467		0.661099	0.410832	0.672209	0.825652	0.796334	0.937238	0.890726	0.266424	0.968917				-0.0271753			0.393578
hsa-mir-9-1																														0.820789					0.758608		0.664104
hsa-mir-9-2																							6.05738e-07						0.248619						-6.0677e-07
hsa-mir-9-3
hsa-mir-92a-1																								0.558658								-8.0647e-07											1.68729e-07
hsa-mir-92a-2																				1.66962e-06				-7.96702e-07
hsa-mir-92b
hsa-mir-93		-0.634168	0.661515		0.803175	0.477124	0.554251	0.769585	0.640695	0.69278	0.534588	0.775785	0.746612	0.629109	0.575053	0.491495	0.78494	0.901418	0.720747	0.888407	0.966061	0.538175	0.924994	0.506065	0.765084	0.833469	0.782608	0.821686	0.825046	0.755607	0.836676	0.658687	0.613151	0.853522	0.78038	0.837154	0.878119	0.8001	0.91998	0.690969			-0.138862	0.385946	0.99843		0.43316	-0.175046	0.0403433
hsa-mir-95					0.584905						-1.19032e-07	0.217393							-0.0370379	0.64548			0.448631	-0.0236216	0.0662322		-4.92336e-07			0.817185	0.288	0.09642	0.135445		-2.33143e-06	0.680742		3.39336e-06	0.845657	0.928309				6.86093e-07			-1.983e-06
hsa-mir-96																																			0.76403
hsa-mir-98				0.628943					0.793814		0.723375				0.769325								0.9117	0.947132	0.884084								0.789296	0.943113	0.904747	0.976272		0.864919	0.98717	0.935675			0.875268					0.843111
hsa-mir-99a			0.878848	-1.08963e-06	0.809224			-9.08967e-07	0.553343	0.671821	0.748494	0.668385		0.851427	0.555555	0.978598	0.934977	0.731276	0.790487	0.85777	0.459035		0.906619	0.881889	0.725275	0.922161			0.960751	0.940785		0.935748	0.951992	0.244269		0.801425		0.661636		0.907746			0.00315881	0.31757			0.258807	-0.838509
hsa-mir-99b				-3.26147e-06				0.572373							0.639004			0.33167	2.40543e-06	0.5403								0.625903	0.0870011	-0.783022				0					0.31511	-0.473473						-0.626447	0.437242		-0.0179697
